# Supplementary material for: Detection of familial hypercholesterolaemia: external validation of the FAMCAT clinical case-finding algorithm to identify patients in primary care
Source: PubMed Central journal article supplement (PMC6506568; doi:10.1016/s2468-2667(19)30061-1), 2019-05-01
Supplement: mmc1.pdf [file mmc1.pdf]

# THE LANCET

## Public Health

### Supplementary appendix

This appendix formed part of the original submission and has been peer reviewed. We post it as supplied by the authors.

Supplement to: Weng S, Kai J, Akyea R, Qureshi N. Detection of familial hypercholesterolaemia: external validation of the FAMCAT clinical case-finding algorithm to identify patients in primary care. *Lancet Public Health* 2019; **4**: e256–64.

**Supplemental Table 1. FAMCAT algorithm coefficients and constants derived from the Clinical Practice Research Datalink (CPRD) for determining probability of familial hypercholesterolaemia**

| Diagnostic Variables                                            | Coefficients |         |
|-----------------------------------------------------------------|--------------|---------|
|                                                                 | Men          | Women   |
| <b>Total cholesterol or LDL-cholesterol recorded (mmol/L)</b>   |              |         |
| Ideal                                                           | 0.0000       | 0.0000  |
| High                                                            | 0.9159       | 0.9557  |
| Very High                                                       | 2.0515       | 2.0951  |
| Extremely High                                                  | 3.6367       | 3.7633  |
| <b>Age during cholesterol measurement (years)</b>               |              |         |
| 16-24                                                           | 0.0000       | 0.0000  |
| 25-34                                                           | -0.5653      | -0.3536 |
| 35-44                                                           | -1.0734      | -0.8451 |
| 45-54                                                           | -1.5090      | -1.2109 |
| 55-64                                                           | -2.0856      | -1.5836 |
| 65-74                                                           | -2.6143      | -2.0009 |
| 75-84                                                           | -2.9906      | -2.7792 |
| 85 or above                                                     | -2.9887      | -3.1668 |
| <b>Triglycerides during cholesterol measurement (mmol/L)</b>    |              |         |
| Ideal                                                           | 0.0000       | 0.0000  |
| Borderline High                                                 | -0.0593      | -0.0411 |
| High                                                            | -0.2111      | -0.1612 |
| Very High                                                       | -0.3239      | -0.5468 |
| <b>Lipid lowering drug usage during cholesterol measurement</b> |              |         |
| No lipid lowering drugs prescribed                              | 0.0000       | 0.0000  |
| Other drugs                                                     | 1.5683       | 1.4576  |
| Low potency statins                                             | 0.9104       | 1.0184  |
| Medium potency statin                                           | 1.4967       | 1.2584  |
| High potency statins                                            | 2.3647       | 1.8423  |
| <b>Family history of familial hypercholesterolaemia</b>         |              |         |
| No                                                              | 0.0000       | 0.0000  |
| Yes                                                             | 2.3972       | 2.1053  |
| <b>Family history of coronary heart disease</b>                 |              |         |
| No                                                              | 0.0000       | 0.0000  |
| Yes                                                             | 0.6377       | 0.5617  |
| <b>Family history of raised cholesterol</b>                     |              |         |
| No                                                              | 0.0000       | 0.0000  |
| Yes                                                             | 1.1706       | 1.1719  |
| <b>Diagnosis of diabetes</b>                                    |              |         |
| No                                                              | 0.0000       | 0.0000  |
| Yes                                                             | -1.1004      | -0.8887 |
| <b>Diagnosis of kidney disease</b>                              |              |         |
| No                                                              | 0.0000       | 0.0000  |
| Yes                                                             | -0.4293      | -0.3215 |
| <b>Constant Term</b>                                            | -6.5788      | -6.7398 |

$$\text{Probability of Familial Hypercholesterolaemia} = \frac{e^{xb}}{1 + e^{xb}}$$

where  $xb$  is the linear predictor of the combined coefficients and constant

**Supplemental Table 2. Model discrimination in the external validation cohort for identifying familial hypercholesterolaemia in primary care, stratified by gender (n = 747,000)**

| Models                                                  | Men (n = 362,769)   |                             |                         | Women (n = 384,231) |                             |                         |
|---------------------------------------------------------|---------------------|-----------------------------|-------------------------|---------------------|-----------------------------|-------------------------|
|                                                         | AUROC (c-statistic) | Standard Error <sup>s</sup> | 95% Confidence Interval | AUROC (c-statistic) | Standard Error <sup>s</sup> | 95% Confidence Interval |
| FAMCAT                                                  | 0.815               | 0.008                       | 0.799 – 0.831           | 0.848               | 0.007                       | 0.834 – 0.862           |
| Simon Broome Criteria <sup>a</sup>                      | 0.673               | 0.011                       | 0.651 – 0.695           | 0.707               | 0.008                       | 0.691 – 0.723           |
| Dutch Lipid Clinic Criteria <sup>b</sup>                | 0.703               | 0.011                       | 0.681 – 0.725           | 0.737               | 0.009                       | 0.719 – 0.755           |
| MEDPED Criteria <sup>c</sup>                            | 0.615               | 0.011                       | 0.593 – 0.637           | 0.635               | 0.008                       | 0.619 – 0.650           |
| Cholesterol above 99 <sup>th</sup> centile <sup>d</sup> | 0.559               | 0.008                       | 0.543 – 0.575           | 0.595               | 0.007                       | 0.581 – 0.609           |

<sup>s</sup> Jack-knife procedure to estimate standard errors <sup>20</sup>

<sup>a</sup> Total cholesterol > 7.5 mmol/L or LDL-cholesterol > 4.9 mmol/L + family history of premature myocardial infarction <sup>10</sup>

<sup>b</sup> Score based on LDL-cholesterol, family history, clinical history, and physical examination <sup>11</sup>

<sup>c</sup> Age-stratified total cholesterol thresholds for the general population <sup>12</sup>

<sup>d</sup> Total cholesterol > 9.0 mmol/L or LDL-cholesterol > 6.6 mmol/L if age > 30 years; Total cholesterol > 7.5 mmol/L or LDL-cholesterol > 4.9 mmol/L if age ≤ 30 years <sup>10</sup>

**Supplemental Table 3. FAMCAT optimised algorithm coefficients and constants derived from the QRESEARCH for determining probability of familial hypercholesterolaemia**

| Diagnostic Variables                                                      | Coefficients |          |
|---------------------------------------------------------------------------|--------------|----------|
|                                                                           | Men          | Women    |
| Highest cholesterol recorded (mmol/L)                                     |              |          |
| If LDL Cholesterol measured                                               | 0.9458       | 1.1927   |
| If Total Cholesterol measured                                             | 0.5308       | 0.6702   |
| Age during cholesterol measurements (years)                               | -0.0297      | -0.0079  |
| Log triglycerides during cholesterol measurement (mmol/L)                 | -1.8518      | -2.5594  |
| Lipid lowering drugs prescribed during cholesterol measurement *          |              |          |
| Prescribed fibrate, bile acid sequestrant, or nicotinic acid <sup>a</sup> | 1.9494       | 1.3822   |
| Prescribed low potency statin <sup>b</sup>                                | 0.0323       | 1.2637   |
| Prescribed medium potency statin <sup>c</sup>                             | 0.4466       | 0.5440   |
| Prescribed high potency statin <sup>d</sup>                               | 0.5649       | 0.9350   |
| Previously history of premature myocardial infarction*                    | 0.8319       | 0.4337   |
| Family history of familial hypercholesterolaemia*                         | 1.9076       | 0.9109   |
| Family history of myocardial infarction* <sup>+</sup>                     | 1.2621       | 1.4754   |
| Family history of raised cholesterol*                                     | 1.0297       | 0.7521   |
| Diagnosis of diabetes*                                                    | -1.3997      | -0.7738  |
| Diagnosis of chronic kidney disease*                                      | -0.2528      | -1.7661  |
| Constant                                                                  | -8.1134      | -10.0826 |

\* Reference group = none ( $\beta = 1$ ); <sup>a</sup> Fluvastatin/Pravastatin 40 mg/day, Simvastatin 10 mg/day; <sup>b</sup> Fluvastatin/Pravastatin 80 mg/day, Simvastatin 20-40 mg/day, Atorvastatin 10 mg/day, Rosuvastatin 5 mg; <sup>c</sup> Simvastatin 80 mg, Atorvastatin 20 mg/day, Rosuvastatin 10 mg/day; <sup>+</sup> premature defined as < 55 years in men and < 60 years in women

$$\text{Probability of Familial Hypercholesterolaemia} = \frac{e^{xb}}{1 + e^{xb}}$$

where  $xb$  is the linear predictor of the combined coefficients and constant

**Supplemental Table 4. Clinical examples using FAMCAT for case-finding in primary care compared to standard guidance**

| FAMCAT ranking of patients' likelihood of FH | Age | Sex | LDL Cholesterol (mmol/L) | Triglycerides (mmol/L) | Family History                | Lipid Lowering Drug   | Secondary Causes | FAMCAT Relative Risk* | Meets NICE-recommended Simon Broome criteria for referral <sup>11</sup> | Primary Care Decision after applying FAMCAT                                                                 |
|----------------------------------------------|-----|-----|--------------------------|------------------------|-------------------------------|-----------------------|------------------|-----------------------|-------------------------------------------------------------------------|-------------------------------------------------------------------------------------------------------------|
| 1st                                          | 43  | M   | 5.1                      | 1.3                    | MI < 60 y, Raised Cholesterol | Simvastatin 40 mg/day | None             | 164.74                | Yes                                                                     | Refer to lipid specialist                                                                                   |
| 5th                                          | 33  | M   | 4.7                      | 0.8                    | MI < 60 y, Raised Cholesterol | None                  | None             | 18.06                 | No                                                                      | Refer to lipid specialist despite not meeting Simon Broome criteria                                         |
| 21st                                         | 51  | F   | 4.5                      | 2.0                    | MI < 60 y                     | Simvastatin 10 mg/day | None             | 6.58                  | No                                                                      | Refer to lipid specialist despite not meeting Simon Broome criteria                                         |
| 441st                                        | 66  | M   | 5.5                      | 4.8                    | MI < 60 y                     | None                  | Type 2 diabetes  | 0.98                  | Yes                                                                     | Although meets Simon Broome criteria, not referred - low FAMCAT rank, note diabetes & raised triglycerides) |

\* Relative risk is calculated by dividing the probability of FH generated by FAMCAT regression equations by 0.002 (estimated 1/500 prevalence of FH in the general population)

FAMCAT algorithm (regression equations) is applied to the general practice electronic health records of all individuals who have a recorded lipids measurement. Each patient in a practice is then individually ranked by this tool from highest to lowest likelihood of FH. The FAMCAT algorithm can be found at <https://prism-uon.shinyapps.io/FAMCAT/> for general population usage. For UK general practices, there is also an integrated case-finding tool.<sup>15</sup> This is currently freely available to practices using EMIS or SystmOne/TPP as a quality improvement tool (<https://www.nottingham.ac.uk/primis/tools-audits/tools-audits/familial-hypercholesterolaemia.aspx>).

**Online Supplement: FAMCAT web based calculator (linked to calculator provided below)**

Familial Hypercholesterolaemia Case Ascertainment Tool (FAMCAT)

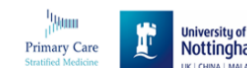

ENTER/SELECT DETAILS BELOW:

Gender

Age at the time cholesterol measured (years)

Total Cholesterol (mmol/L)

LDL Cholesterol (mmol/L)

Triglycerides (mmol/L)

On lipid lowering drug therapy when cholesterol measured

Family history of familial hypercholesterolaemia

Family history of myocardial infarction

Family history of raised cholesterol

Previously diagnosed with diabetes

Previously diagnosed with chronic kidney disease

**Welcome to the FAMCAT online risk calculator**  
 You can use this calculator to work out the likelihood of an individual having an inherited condition called **Familial Hypercholesterolaemia**. This is a common inherited cause of raised cholesterol, affecting at least 1 in 500 individuals in the general population. However, up to 80% of people with FH are still not identified in many countries, leading to many avoidable heart attacks and early deaths. The risk of heart disease can be dramatically reduced by starting medicines to lower cholesterol levels.

The FAMCAT calculator determines the likelihood of having familial hypercholesterolaemia. This is based on calculating a probability value using data entered in this application. The algorithm then estimates a **relative population risk**.

**A relative population risk < 1** means the individual is unlikely to have familial hypercholesterolaemia. We suggest keeping family history updated regularly

**A relative population risk from 1 - 5** means the individual may have familial hypercholesterolaemia. We suggest confirming the family history is correct and consider referral to lipid specialists following clinical guidelines

**A relative population risk from > 5** means the individual is likely to have familial hypercholesterolaemia. We suggest referral to lipid specialists and considering genetic testing following clinical guidelines

| FAMCAT Calculator                                   | Probability (%) | Relative Population Risk |
|-----------------------------------------------------|-----------------|--------------------------|
| Likelihood of having familial hypercholesterolaemia | 0.00            | 0.27                     |

**Disclaimer:** The FAMCAT algorithm has been developed by the **Primary Care Stratified Medicine (PRISM)** team based in the Division of Primary Care at the University of Nottingham. The algorithm has been developed and validated using patient data which has been routinely collected by doctors and nurses in UK family practices contributing to the **Clinical Practice Research Datalink**. Further, the algorithm has now been externally validated using another routinely collected database of entirely separate UK family practices contributing to **QRESEARCH**. All medical decisions need to be taken in consultation with a licensed health care professional. The authors accept no responsibility for clinical use or misuse of this tool.

**Publication:** Full details of the algorithm development and validation can be found in peer-reviewed journal *Atherosclerosis*

**Copyright:** Primary Care Stratified Medicine, University of Nottingham 2018. All rights reserved

**Useful Links:** Guidelines for identification and management of familial hypercholesterolaemia

UK: [National Institute for Health and Care Excellence](#)

Europe: [ESC/EAS Task Force](#)

US: [ACC/AHA Task Force](#)

**Contact Details:** Dr Stephen Weng, Assistant Professor of Integrative Epidemiology and Data Science, University of Nottingham, [stephen.weng@nottingham.ac.uk](mailto:stephen.weng@nottingham.ac.uk)

<https://prism-uon.shinyapps.io/FAMCAT/>

**Supplementary – Code List of All Variables Included in the Model**

**1) Lipid Measurements**

*Total Cholesterol*

|          |                                 |
|----------|---------------------------------|
| 44OE     | Plasma total cholesterol level  |
| 44P      | Serum cholesterol               |
| 44P1     | Serum cholesterol normal        |
| 44P2     | Serum cholesterol borderline    |
| 44P3     | Serum cholesterol raised        |
| 44P4     | Serum cholesterol very high     |
| 44PH     | Total cholesterol measurement   |
| 44PJ     | Serum total cholesterol level   |
| 44PK     | Serum fasting total cholesterol |
| 44PZ     | Serum cholesterol NOS           |
| 4I3O     | Fluid sample cholesterol level  |
| EGTON456 | Fasting serum cholesterol       |

*LDL Cholesterol*

|          |                                                      |
|----------|------------------------------------------------------|
| 44d4     | Plasma random LDL cholesterol level                  |
| 44d5     | Plasma fasting LDL cholesterol level                 |
| 44dB     | Plasma LDL cholesterol level                         |
| 44P6     | Serum LDL cholesterol level                          |
| 44P7     | Serum VLDL cholesterol level                         |
| 44PD     | Serum fasting LDL cholesterol level                  |
| 44PE     | Serum random LDL cholesterol level                   |
| 44PI     | Calculated LDL cholesterol level                     |
| 44PL     | Non HDL cholesterol level                            |
| 44PL0    | Serum non high density lipoprotein cholesterol level |
| 44PL1    | Estimated serum non-HDL cholesterol level            |
| EGTONLD1 | LDL cholesterol level                                |

*Triglycerides*

|      |                                   |
|------|-----------------------------------|
| 44e  | Plasma triglyceride level         |
| 44e0 | Plasma random triglyceride level  |
| 44e1 | Plasma fasting triglyceride level |
| 44Q  | Serum triglycerides               |
| 44Q1 | Serum triglycerides normal        |
| 44Q2 | Serum triglycerides borderline    |
| 44Q3 | Serum triglycerides raised        |
| 44Q4 | Serum fasting triglyceride level  |
| 44Q5 | Serum random triglyceride level   |
| 44QZ | Serum triglycerides NOS           |
| 4I3W | Fluid sample triglyceride level   |
| 4QA1 | Triglyceride level                |

|          |                       |
|----------|-----------------------|
| EGTON457 | Fasting triglycerides |
|----------|-----------------------|

## 2) Definite Familial Hypercholesterolaemia

|        |                                |
|--------|--------------------------------|
| C320-1 | Familial hypercholesterolaemia |
| C3200  | Familial hypercholesterolaemia |

## 3) Family History of Familial Hypercholesterolaemia

|      |                                                  |
|------|--------------------------------------------------|
| 1269 | Family history of familial hypercholesterolaemia |
|------|--------------------------------------------------|

## 4) Family History of Raised Cholesterol/Hypercholesterolaemia

|      |                                                    |
|------|----------------------------------------------------|
| 122H | No FH of hypercholesterolaemia                     |
| 1262 | FH: Raised blood lipids                            |
| 126B | FH: Hypercholesterolaemia in first degree relative |

## 5) Family History of myocardial infarction

|         |                                                              |
|---------|--------------------------------------------------------------|
| 12C2-1  | FH: Myocardial infarction < 60                               |
| 12C2-2  | FH: MI- Myocardial infarct <60                               |
| 12C3-1  | FH: Myocardial infarction > 60                               |
| 12C3-2  | FH: MI- myocardial infarct >60                               |
| 12C5    | FH: Myocardial infarction                                    |
| 12C5-2  | FH: Ischaemic heart disease                                  |
| 12CA    | FH myocardial infarction male first degree age known         |
| 12CB    | FH myocardial infarction male first degree age unknown       |
| 12CC    | FH myocardial infarction female first degree age known       |
| 12CD    | FH myocardial infarction female first degree age unknown     |
| 12CI    | FH: premature coronary heart disease                         |
| 12CN    | FH: Myocardial infarct in 1st degree female relative <65 yrs |
| 12CP    | FH: Myocardial infarct in 1st degree male relative <55 years |
| ZV173   | [V]Family history of ischaemic heart disease                 |
| ZV173-1 | [V]Family history of ischaemic heart disease (IHD)           |
| ZV173-2 | [V]Family history of myocardial infarction                   |

## 6) History of cardiovascular disease

### Coronary Heart Disease

|       |                                |
|-------|--------------------------------|
| G3    | Ischaemic heart disease        |
| G3-1  | Arteriosclerotic heart disease |
| G3-2  | Atherosclerotic heart disease  |
| G3-3  | IHD - Ischaemic heart disease  |
| G30   | Acute myocardial infarction    |
| G30-1 | Attack - heart                 |
| G30-2 | Coronary thrombosis            |



|         |                                                         |
|---------|---------------------------------------------------------|
| G30-3   | Cardiac rupture following myocardial infarction (MI)    |
| G30-4   | Heart attack                                            |
| G30-5   | MI - acute myocardial infarction                        |
| G30-6   | Thrombosis - coronary                                   |
| G30-7   | Silent myocardial infarction                            |
| G300    | Acute anterolateral infarction                          |
| G301    | Other specified anterior myocardial infarction          |
| G3010   | Acute anteroapical infarction                           |
| G3011   | Acute anteroseptal infarction                           |
| G301z   | Anterior myocardial infarction NOS                      |
| G302    | Acute inferolateral infarction                          |
| G303    | Acute inferoposterior infarction                        |
| G304    | Posterior myocardial infarction NOS                     |
| G305    | Lateral myocardial infarction NOS                       |
| G306    | True posterior myocardial infarction                    |
| G307    | Acute subendocardial infarction                         |
| G3070   | Acute non-Q wave infarction                             |
| G3071   | Acute non-ST segment elevation myocardial infarction    |
| G308    | Inferior myocardial infarction NOS                      |
| G309    | Acute Q-wave infarct                                    |
| G30B    | Acute posterolateral myocardial infarction              |
| G30X    | Acute transmural myocardial infarction of unspecif site |
| G30X0   | Acute ST segment elevation myocardial infarction        |
| G30y    | Other acute myocardial infarction                       |
| G30y0   | Acute atrial infarction                                 |
| G30y1   | Acute papillary muscle infarction                       |
| G30y2   | Acute septal infarction                                 |
| G30yz   | Other acute myocardial infarction NOS                   |
| G30z    | Acute myocardial infarction NOS                         |
| G31     | Other acute and subacute ischaemic heart disease        |
| G310    | Postmyocardial infarction syndrome                      |
| G310-1  | Dressler's syndrome                                     |
| G311    | Preinfarction syndrome                                  |
| G311-1  | Crescendo angina                                        |
| G311-2  | Impending infarction                                    |
| G311-3  | Unstable angina                                         |
| G311-4  | Angina at rest                                          |
| G3110   | Myocardial infarction aborted                           |
| G3110-1 | MI - myocardial infarction aborted                      |
| G3111   | Unstable angina                                         |
| G3112   | Angina at rest                                          |
| G3113   | Refractory angina                                       |
| G3114   | Worsening angina                                        |
| G3115   | Acute coronary syndrome                                 |

|        |                                                              |
|--------|--------------------------------------------------------------|
| G311z  | Preinfarction syndrome NOS                                   |
| G312   | Coronary thrombosis not resulting in myocardial infarction   |
| G31y   | Other acute and subacute ischaemic heart disease             |
| G31y0  | Acute coronary insufficiency                                 |
| G31y2  | Subendocardial ischaemia                                     |
| G31y3  | Transient myocardial ischaemia                               |
| G31yz  | Other acute and subacute ischaemic heart disease NOS         |
| G32    | Old myocardial infarction                                    |
| G32-1  | Healed myocardial infarction                                 |
| G32-2  | Personal history of myocardial infarction                    |
| G33    | Angina pectoris                                              |
| G330   | Angina decubitus                                             |
| G3300  | Nocturnal angina                                             |
| G330z  | Angina decubitus NOS                                         |
| G33z   | Angina pectoris NOS                                          |
| G33z0  | Status anginosus                                             |
| G33z1  | Stenocardia                                                  |
| G33z2  | Syncope anginosa                                             |
| G33z3  | Angina on effort                                             |
| G33z4  | Ischaemic chest pain                                         |
| G33z5  | Post infarct angina                                          |
| G33z6  | New onset angina                                             |
| G33z7  | Stable angina                                                |
| G33zz  | Angina pectoris NOS                                          |
| G34    | Other chronic ischaemic heart disease                        |
| G340   | Coronary atherosclerosis                                     |
| G340-1 | Triple vessel disease of the heart                           |
| G340-2 | Coronary artery disease                                      |
| G3400  | Single coronary vessel disease                               |
| G3401  | Double coronary vessel disease                               |
| G342   | Atherosclerotic cardiovascular disease                       |
| G344   | Silent myocardial ischaemia                                  |
| G34y   | Other specified chronic ischaemic heart disease              |
| G34y0  | Chronic coronary insufficiency                               |
| G34y1  | Chronic myocardial ischaemia                                 |
| G34yz  | Other specified chronic ischaemic heart disease NOS          |
| G34z   | Other chronic ischaemic heart disease NOS                    |
| G34z0  | Asymptomatic coronary heart disease                          |
| G35    | Subsequent myocardial infarction                             |
| G350   | Subsequent myocardial infarction of anterior wall            |
| G351   | Subsequent myocardial infarction of inferior wall            |
| G353   | Subsequent myocardial infarction of other sites              |
| G35X   | Subsequent myocardial infarction of unspecified site         |
| G36    | Certain current complication follow acute myocardial infarct |

|      |                                                              |
|------|--------------------------------------------------------------|
| G360 | Haemopericardium/current comp folow acut myocard infarct     |
| G361 | Atrial septal defect/curr comp folow acut myocardal infarct  |
| G362 | Ventric septal defect/curr comp fol acut myocardal infarctn  |
| G363 | Ruptur cardiac wall w/out haemopericard/cur comp fol ac MI   |
| G364 | Ruptur chordae tendinae/curr comp fol acute myocard infarct  |
| G365 | Rupture papillary muscle/curr comp fol acute myocard infarct |
| G366 | Thrombosis atrium,auric append&vent/curr comp foll acute MI  |
| G38  | Postoperative myocardial infarction                          |
| G380 | Postoperative transmural myocardial infarction anterior wall |
| G381 | Postoperative transmural myocardial infarction inferior wall |
| G384 | Postoperative subendocardial myocardial infarction           |
| G38z | Postoperative myocardial infarction, unspecified             |

#### *Cerebrovascular Accident*

|       |                                                            |
|-------|------------------------------------------------------------|
| G61-2 | Stroke due to intracerebral haemorrhage                    |
| G64-3 | Stroke due to cerebral arterial occlusion                  |
| G65-2 | Transient ischaemic attack                                 |
| G66   | Stroke and cerebrovascular accident unspecified            |
| G66-2 | Stroke unspecified                                         |
| G663  | Brain stem stroke syndrome                                 |
| G664  | Cerebellar stroke syndrome                                 |
| G68X  | Sequelae of stroke,not specfd as h'morrhage or infarction  |
| Gyu30 | [X]Other forms of angina pectoris                          |
| Gyu34 | [X]Acute transmural myocardial infarction of unspecif site |

#### **7) History of Peripheral Vascular Disease**

|       |                                                 |
|-------|-------------------------------------------------|
| G73   | Other peripheral vascular disease               |
| G73y  | Other specified peripheral vascular disease     |
| G73yz | Other specified peripheral vascular disease NOS |
| G73z  | Peripheral vascular disease NOS                 |
| G73zz | Peripheral vascular disease NOS                 |
| Gyu74 | [X]Other specified peripheral vascular diseases |

#### **8) History of Diabetes**

|         |                                                              |
|---------|--------------------------------------------------------------|
| IJL     | Suspected diabetes mellitus                                  |
| 66AJ-1  | Unstable diabetes                                            |
| 66AJ1   | Brittle diabetes                                             |
| C10     | Diabetes mellitus                                            |
| C100    | Diabetes mellitus with no mention of complication            |
| C1000   | Diabetes mellitus, juvenile type, no mention of complication |
| C1000-1 | Insulin dependent diabetes mellitus                          |
| C1001   | Diabetes mellitus, adult onset, no mention of complication   |
| C1001-1 | Maturity onset diabetes                                      |

|         |                                                              |
|---------|--------------------------------------------------------------|
| C1001-2 | Non-insulin dependent diabetes mellitus                      |
| C100z   | Diabetes mellitus NOS with no mention of complication        |
| C101    | Diabetes mellitus with ketoacidosis                          |
| C1010   | Diabetes mellitus, juvenile type, with ketoacidosis          |
| C1011   | Diabetes mellitus, adult onset, with ketoacidosis            |
| C101y   | Other specified diabetes mellitus with ketoacidosis          |
| C101z   | Diabetes mellitus NOS with ketoacidosis                      |
| C102    | Diabetes mellitus with hyperosmolar coma                     |
| C1020   | Diabetes mellitus, juvenile type, with hyperosmolar coma     |
| C1021   | Diabetes mellitus, adult onset, with hyperosmolar coma       |
| C102z   | Diabetes mellitus NOS with hyperosmolar coma                 |
| C103    | Diabetes mellitus with ketoacidotic coma                     |
| C1030   | Diabetes mellitus, juvenile type, with ketoacidotic coma     |
| C1031   | Diabetes mellitus, adult onset, with ketoacidotic coma       |
| C103y   | Other specified diabetes mellitus with coma                  |
| C103z   | Diabetes mellitus NOS with ketoacidotic coma                 |
| C104    | Diabetes mellitus with renal manifestation                   |
| C1040   | Diabetes mellitus, juvenile type, with renal manifestation   |
| C1041   | Diabetes mellitus, adult onset, with renal manifestation     |
| C104y   | Other specified diabetes mellitus with renal complications   |
| C104z   | Diabetes mellitus with nephropathy NOS                       |
| C105    | Diabetes mellitus with ophthalmic manifestation              |
| C1050   | Diabetes mellitus, juvenile type, + ophthalmic manifestation |
| C1051   | Diabetes mellitus, adult onset, + ophthalmic manifestation   |
| C105y   | Other specified diabetes mellitus with ophthalmic complicatn |
| C105z   | Diabetes mellitus NOS with ophthalmic manifestation          |
| C106    | Diabetes mellitus with neurological manifestation            |
| C106-2  | Diabetes mellitus with neuropathy                            |
| C106-3  | Diabetes mellitus with polyneuropathy                        |
| C1060   | Diabetes mellitus, juvenile, + neurological manifestation    |
| C1061   | Diabetes mellitus, adult onset, + neurological manifestation |
| C106y   | Other specified diabetes mellitus with neurological comps    |
| C106z   | Diabetes mellitus NOS with neurological manifestation        |
| C107    | Diabetes mellitus with peripheral circulatory disorder       |
| C107-1  | Diabetes mellitus with gangrene                              |
| C107-2  | Diabetes with gangrene                                       |
| C1070   | Diabetes mellitus, juvenile +peripheral circulatory disorder |
| C1071   | Diabetes mellitus, adult, + peripheral circulatory disorder  |
| C1072   | Diabetes mellitus, adult with gangrene                       |
| C107z   | Diabetes mellitus NOS with peripheral circulatory disorder   |
| C108    | Insulin dependent diabetes mellitus                          |
| C108-1  | IDDM-Insulin dependent diabetes mellitus                     |
| C108-2  | Type 1 diabetes mellitus                                     |
| C108-3  | Type I diabetes mellitus                                     |

|         |                                                              |
|---------|--------------------------------------------------------------|
| C1080   | Insulin-dependent diabetes mellitus with renal complications |
| C1080-1 | Type I diabetes mellitus with renal complications            |
| C1080-2 | Type 1 diabetes mellitus with renal complications            |
| C1081   | Insulin-dependent diabetes mellitus with ophthalmic comps    |
| C1081-2 | Type 1 diabetes mellitus with ophthalmic complications       |
| C1082   | Insulin-dependent diabetes mellitus with neurological comps  |
| C1082-1 | Type I diabetes mellitus with neurological complications     |
| C1082-2 | Type 1 diabetes mellitus with neurological complications     |
| C1083   | Insulin dependent diabetes mellitus with multiple complicatn |
| C1084   | Unstable insulin dependent diabetes mellitus                 |
| C1084-1 | Unstable type I diabetes mellitus                            |
| C1084-2 | Unstable type 1 diabetes mellitus                            |
| C1085   | Insulin dependent diabetes mellitus with ulcer               |
| C1085-1 | Type I diabetes mellitus with ulcer                          |
| C1085-2 | Type 1 diabetes mellitus with ulcer                          |
| C1086   | Insulin dependent diabetes mellitus with gangrene            |
| C1087   | Insulin dependent diabetes mellitus with retinopathy         |
| C1087-1 | Type I diabetes mellitus with retinopathy                    |
| C1087-2 | Type 1 diabetes mellitus with retinopathy                    |
| C1088   | Insulin dependent diabetes mellitus - poor control           |
| C1088-1 | Type I diabetes mellitus - poor control                      |
| C1088-2 | Type 1 diabetes mellitus - poor control                      |
| C1089   | Insulin dependent diabetes maturity onset                    |
| C1089-1 | Type I diabetes mellitus maturity onset                      |
| C1089-2 | Type 1 diabetes mellitus maturity onset                      |
| C108A   | Insulin-dependent diabetes without complication              |
| C108A-1 | Type I diabetes mellitus without complication                |
| C108B   | Insulin dependent diabetes mellitus with mononeuropathy      |
| C108B-1 | Type I diabetes mellitus with mononeuropathy                 |
| C108C   | Insulin dependent diabetes mellitus with polyneuropathy      |
| C108D   | Insulin dependent diabetes mellitus with nephropathy         |
| C108D-1 | Type I diabetes mellitus with nephropathy                    |
| C108E   | Insulin dependent diabetes mellitus with hypoglycaemic coma  |
| C108E-1 | Type I diabetes mellitus with hypoglycaemic coma             |
| C108E-2 | Type 1 diabetes mellitus with hypoglycaemic coma             |
| C108F   | Insulin dependent diabetes mellitus with diabetic cataract   |
| C108F-1 | Type I diabetes mellitus with diabetic cataract              |
| C108H   | Insulin dependent diabetes mellitus with arthropathy         |
| C108H-1 | Type I diabetes mellitus with arthropathy                    |
| C108J-1 | Type I diabetes mellitus with neuropathic arthropathy        |
| C108J-2 | Type 1 diabetes mellitus with neuropathic arthropathy        |
| C108y   | Other specified diabetes mellitus with multiple comps        |
| C108z   | Unspecified diabetes mellitus with multiple complications    |
| C109    | Non-insulin dependent diabetes mellitus                      |

|         |                                                              |
|---------|--------------------------------------------------------------|
| C109-1  | NIDDM - Non-insulin dependent diabetes mellitus              |
| C109-2  | Type 2 diabetes mellitus                                     |
| C109-3  | Type II diabetes mellitus                                    |
| C1090   | Non-insulin-dependent diabetes mellitus with renal comps     |
| C1090-1 | Type II diabetes mellitus with renal complications           |
| C1090-2 | Type 2 diabetes mellitus with renal complications            |
| C1091   | Non-insulin-dependent diabetes mellitus with ophthalm comps  |
| C1091-1 | Type II diabetes mellitus with ophthalmic complications      |
| C1091-2 | Type 2 diabetes mellitus with ophthalmic complications       |
| C1092   | Non-insulin-dependent diabetes mellitus with neuro comps     |
| C1092-1 | Type II diabetes mellitus with neurological complications    |
| C1092-2 | Type 2 diabetes mellitus with neurological complications     |
| C1093   | Non-insulin-dependent diabetes mellitus with multiple comps  |
| C1094   | Non-insulin dependent diabetes mellitus with ulcer           |
| C1094-1 | Type II diabetes mellitus with ulcer                         |
| C1094-2 | Type 2 diabetes mellitus with ulcer                          |
| C1095   | Non-insulin dependent diabetes mellitus with gangrene        |
| C1095-1 | Type II diabetes mellitus with gangrene                      |
| C1095-2 | Type 2 diabetes mellitus with gangrene                       |
| C1096   | Non-insulin-dependent diabetes mellitus with retinopathy     |
| C1096-1 | Type II diabetes mellitus with retinopathy                   |
| C1096-2 | Type 2 diabetes mellitus with retinopathy                    |
| C1097   | Non-insulin dependent diabetes mellitus - poor control       |
| C1097-1 | Type II diabetes mellitus - poor control                     |
| C1097-2 | Type 2 diabetes mellitus - poor control                      |
| C1099   | Non-insulin-dependent diabetes mellitus without complication |
| C109A   | Non-insulin dependent diabetes mellitus with mononeuropathy  |
| C109A-1 | Type II diabetes mellitus with mononeuropathy                |
| C109B   | Non-insulin dependent diabetes mellitus with polyneuropathy  |
| C109B-1 | Type II diabetes mellitus with polyneuropathy                |
| C109C   | Non-insulin dependent diabetes mellitus with nephropathy     |
| C109C-1 | Type II diabetes mellitus with nephropathy                   |
| C109C-2 | Type 2 diabetes mellitus with nephropathy                    |
| C109D   | Non-insulin dependent diabetes mellitus with hypoglyca coma  |
| C109D-1 | Type II diabetes mellitus with hypoglycaemic coma            |
| C109D-2 | Type 2 diabetes mellitus with hypoglycaemic coma             |
| C109E   | Non-insulin depend diabetes mellitus with diabetic cataract  |
| C109E-1 | Type II diabetes mellitus with diabetic cataract             |
| C109E-2 | Type 2 diabetes mellitus with diabetic cataract              |
| C109F-1 | Type II diabetes mellitus with peripheral angiopathy         |
| C109F-2 | Type 2 diabetes mellitus with peripheral angiopathy          |
| C109G   | Non-insulin dependent diabetes mellitus with arthropathy     |
| C109G-1 | Type II diabetes mellitus with arthropathy                   |
| C109G-2 | Type 2 diabetes mellitus with arthropathy                    |

|         |                                                              |
|---------|--------------------------------------------------------------|
| C109H-1 | Type II diabetes mellitus with neuropathic arthropathy       |
| C109H-2 | Type 2 diabetes mellitus with neuropathic arthropathy        |
| C109J   | Insulin treated Type 2 diabetes mellitus                     |
| C109J-1 | Insulin treated non-insulin dependent diabetes mellitus      |
| C109J-2 | Insulin treated Type II diabetes mellitus                    |
| C10A5   | Malnutritn-relat diabetes melitus wth periph circul completn |
| C10B    | Diabetes mellitus induced by steroids                        |
| C10B0   | Steroid induced diabetes mellitus without complication       |
| C10C    | Diabetes mellitus autosomal dominant                         |
| C10C-1  | Maturity onset diabetes in youth                             |
| C10C-2  | Maturity onset diabetes in youth type 1                      |
| C10D    | Diabetes mellitus autosomal dominant type 2                  |
| C10D-1  | Maturity onset diabetes in youth type 2                      |
| C10E    | Type 1 diabetes mellitus                                     |
| C10E-1  | Type I diabetes mellitus                                     |
| C10E-2  | Insulin dependent diabetes mellitus                          |
| C10E0   | Type 1 diabetes mellitus with renal complications            |
| C10E0-2 | Insulin-dependent diabetes mellitus with renal complications |
| C10E1   | Type 1 diabetes mellitus with ophthalmic complications       |
| C10E1-1 | Type I diabetes mellitus with ophthalmic complications       |
| C10E1-2 | Insulin-dependent diabetes mellitus with ophthalmic comps    |
| C10E2   | Type 1 diabetes mellitus with neurological complications     |
| C10E2-2 | Insulin-dependent diabetes mellitus with neurological comps  |
| C10E3   | Type 1 diabetes mellitus with multiple complications         |
| C10E3-1 | Type I diabetes mellitus with multiple complications         |
| C10E3-2 | Insulin dependent diabetes mellitus with multiple complicat  |
| C10E4   | Unstable type 1 diabetes mellitus                            |
| C10E4-1 | Unstable type I diabetes mellitus                            |
| C10E4-2 | Unstable insulin dependent diabetes mellitus                 |
| C10E5   | Type 1 diabetes mellitus with ulcer                          |
| C10E5-1 | Type I diabetes mellitus with ulcer                          |
| C10E5-2 | Insulin dependent diabetes mellitus with ulcer               |
| C10E6   | Type 1 diabetes mellitus with gangrene                       |
| C10E6-1 | Type I diabetes mellitus with gangrene                       |
| C10E7   | Type 1 diabetes mellitus with retinopathy                    |
| C10E7-1 | Type I diabetes mellitus with retinopathy                    |
| C10E7-2 | Insulin dependent diabetes mellitus with retinopathy         |
| C10E8   | Type 1 diabetes mellitus - poor control                      |
| C10E8-1 | Type I diabetes mellitus - poor control                      |
| C10E8-2 | Insulin dependent diabetes mellitus - poor control           |
| C10E9   | Type 1 diabetes mellitus maturity onset                      |
| C10E9-1 | Type I diabetes mellitus maturity onset                      |
| C10EA   | Type 1 diabetes mellitus without complication                |
| C10EA-1 | Type I diabetes mellitus without complication                |

|         |                                                             |
|---------|-------------------------------------------------------------|
| C10EA-2 | Insulin-dependent diabetes without complication             |
| C10EB   | Type 1 diabetes mellitus with mononeuropathy                |
| C10EC   | Type 1 diabetes mellitus with polyneuropathy                |
| C10EC-1 | Type 1 diabetes mellitus with polyneuropathy                |
| C10EC-2 | Insulin dependent diabetes mellitus with polyneuropathy     |
| C10ED   | Type 1 diabetes mellitus with nephropathy                   |
| C10ED-2 | Insulin dependent diabetes mellitus with nephropathy        |
| C10EE   | Type 1 diabetes mellitus with hypoglycaemic coma            |
| C10EE-2 | Insulin dependent diabetes mellitus with hypoglycaemic coma |
| C10EF   | Type 1 diabetes mellitus with diabetic cataract             |
| C10EF-2 | Insulin dependent diabetes mellitus with diabetic cataract  |
| C10EG   | Type 1 diabetes mellitus with peripheral angiopathy         |
| C10EH   | Type 1 diabetes mellitus with arthropathy                   |
| C10EJ   | Type 1 diabetes mellitus with neuropathic arthropathy       |
| C10EK   | Type 1 diabetes mellitus with persistent proteinuria        |
| C10EL   | Type 1 diabetes mellitus with persistent microalbuminuria   |
| C10EL-1 | Type 1 diabetes mellitus with persistent microalbuminuria   |
| C10EM   | Type 1 diabetes mellitus with ketoacidosis                  |
| C10EM-1 | Type 1 diabetes mellitus with ketoacidosis                  |
| C10EN   | Type 1 diabetes mellitus with ketoacidotic coma             |
| C10EN-1 | Type 1 diabetes mellitus with ketoacidotic coma             |
| C10EP   | Type 1 diabetes mellitus with exudative maculopathy         |
| C10EP-1 | Type 1 diabetes mellitus with exudative maculopathy         |
| C10EQ   | Type 1 diabetes mellitus with gastroparesis                 |
| C10ER   | Latent autoimmune diabetes mellitus in adult                |
| C10F    | Type 2 diabetes mellitus                                    |
| C10F-1  | Type II diabetes mellitus                                   |
| C10F0   | Type 2 diabetes mellitus with renal complications           |
| C10F0-1 | Type II diabetes mellitus with renal complications          |
| C10F1   | Type 2 diabetes mellitus with ophthalmic complications      |
| C10F1-1 | Type II diabetes mellitus with ophthalmic complications     |
| C10F2   | Type 2 diabetes mellitus with neurological complications    |
| C10F2-1 | Type II diabetes mellitus with neurological complications   |
| C10F3   | Type 2 diabetes mellitus with multiple complications        |
| C10F4   | Type 2 diabetes mellitus with ulcer                         |
| C10F4-1 | Type II diabetes mellitus with ulcer                        |
| C10F5   | Type 2 diabetes mellitus with gangrene                      |
| C10F5-1 | Type II diabetes mellitus with gangrene                     |
| C10F6   | Type 2 diabetes mellitus with retinopathy                   |
| C10F6-1 | Type II diabetes mellitus with retinopathy                  |
| C10F7   | Type 2 diabetes mellitus - poor control                     |
| C10F7-1 | Type II diabetes mellitus - poor control                    |
| C10F9   | Type 2 diabetes mellitus without complication               |
| C10F9-1 | Type II diabetes mellitus without complication              |



|         |                                                              |
|---------|--------------------------------------------------------------|
| C10FA   | Type 2 diabetes mellitus with mononeuropathy                 |
| C10FA-1 | Type II diabetes mellitus with mononeuropathy                |
| C10FB   | Type 2 diabetes mellitus with polyneuropathy                 |
| C10FB-1 | Type II diabetes mellitus with polyneuropathy                |
| C10FC   | Type 2 diabetes mellitus with nephropathy                    |
| C10FC-1 | Type II diabetes mellitus with nephropathy                   |
| C10FD   | Type 2 diabetes mellitus with hypoglycaemic coma             |
| C10FD-1 | Type II diabetes mellitus with hypoglycaemic coma            |
| C10FE   | Type 2 diabetes mellitus with diabetic cataract              |
| C10FE-1 | Type II diabetes mellitus with diabetic cataract             |
| C10FF   | Type 2 diabetes mellitus with peripheral angiopathy          |
| C10FF-1 | Type II diabetes mellitus with peripheral angiopathy         |
| C10FG   | Type 2 diabetes mellitus with arthropathy                    |
| C10FG-1 | Type II diabetes mellitus with arthropathy                   |
| C10FH   | Type 2 diabetes mellitus with neuropathic arthropathy        |
| C10FJ   | Insulin treated Type 2 diabetes mellitus                     |
| C10FJ-1 | Insulin treated Type II diabetes mellitus                    |
| C10FL   | Type 2 diabetes mellitus with persistent proteinuria         |
| C10FL-1 | Type II diabetes mellitus with persistent proteinuria        |
| C10FM   | Type 2 diabetes mellitus with persistent microalbuminuria    |
| C10FM-1 | Type II diabetes mellitus with persistent microalbuminuria   |
| C10FN   | Type 2 diabetes mellitus with ketoacidosis                   |
| C10FP   | Type 2 diabetes mellitus with ketoacidotic coma              |
| C10FQ   | Type 2 diabetes mellitus with exudative maculopathy          |
| C10FR   | Type 2 diabetes mellitus with gastroparesis                  |
| C10G    | Secondary pancreatic diabetes mellitus                       |
| C10G0   | Secondary pancreatic diabetes mellitus without complication  |
| C10H    | Diabetes mellitus induced by non-steroid drugs               |
| C10M    | Lipoatrophic diabetes mellitus                               |
| C10N    | Secondary diabetes mellitus                                  |
| C10N0   | Secondary diabetes mellitus without complication             |
| C10y    | Diabetes mellitus with other specified manifestation         |
| C10y1   | Diabetes mellitus, adult, + other specified manifestation    |
| C10yy   | Other specified diabetes mellitus with other spec comps      |
| C10yz   | Diabetes mellitus NOS with other specified manifestation     |
| C10z    | Diabetes mellitus with unspecified complication              |
| C10z0   | Diabetes mellitus, juvenile type, + unspecified complication |
| C10z1   | Diabetes mellitus, adult onset, + unspecified complication   |
| C10zy   | Other specified diabetes mellitus with unspecified comps     |
| C10zz   | Diabetes mellitus NOS with unspecified complication          |
| C11y0   | Steroid induced diabetes                                     |
| C314-1  | Renal diabetes                                               |
| C3500-1 | Bronzed diabetes                                             |
| Cyu2    | [X]Diabetes mellitus                                         |

|         |                                                           |
|---------|-----------------------------------------------------------|
| Cyu20   | [X]Other specified diabetes mellitus                      |
| Cyu23   | [X]Unspecified diabetes mellitus with renal complications |
| K01x1   | Nephrotic syndrome in diabetes mellitus                   |
| K081    | Nephrogenic diabetes insipidus                            |
| L1808-1 | Gestational diabetes mellitus                             |
| L180X   | Pre-existing diabetes mellitus, unspecified               |

#### 9) History of Kidney Disease

|       |                                                          |
|-------|----------------------------------------------------------|
| I21   | Chronic renal impairment                                 |
| I210  | Chronic kidney disease stage 1                           |
| I211  | Chronic kidney disease stage 2                           |
| I212  | Chronic kidney disease stage 3                           |
| I213  | Chronic kidney disease stage 4                           |
| I214  | Chronic kidney disease stage 5                           |
| I215  | Chronic kidney disease stage 3A                          |
| I216  | Chronic kidney disease stage 3B                          |
| I217  | Chronic kidney disease stage 1 with proteinuria          |
| I218  | Chronic kidney disease stage 1 without proteinuria       |
| I219  | Chronic kidney disease stage 2 with proteinuria          |
| I21A  | Chronic kidney disease stage 2 without proteinuria       |
| I21B  | Chronic kidney disease stage 3 with proteinuria          |
| I21C  | Chronic kidney disease stage 3 without proteinuria       |
| I21D  | Chronic kidney disease stage 3A with proteinuria         |
| I21E  | Chronic kidney disease stage 3A without proteinuria      |
| I21F  | Chronic kidney disease stage 3B with proteinuria         |
| I21G  | Chronic kidney disease stage 3B without proteinuria      |
| I21H  | Chronic kidney disease stage 4 with proteinuria          |
| I21J  | Chronic kidney disease stage 4 without proteinuria       |
| I21K  | Chronic kidney disease stage 5 with proteinuria          |
| I21L  | Chronic kidney disease stage 5 without proteinuria       |
| 7A312 | Open embolisation of renal artery                        |
| 9O5   | Predicted stage chronic kidney disease                   |
| D2150 | Anaemia secondary to chronic renal failure               |
| D4104 | Renal polycythaemia                                      |
| G22   | Hypertensive renal disease                               |
| G222  | Hypertensive renal disease with renal failure            |
| G233  | Hypertensive heart and renal disease with renal failure  |
| G23z  | Hypertensive heart and renal disease NOS                 |
| G701  | Renal artery atherosclerosis                             |
| G721  | Aneurysm of renal artery                                 |
| G763  | Hyperplasia of renal artery                              |
| K0    | Nephritis, nephrosis and nephrotic syndrome              |
| K01   | Nephrotic syndrome                                       |
| K010  | Nephrotic syndrome with proliferative glomerulonephritis |

|         |                                                                |
|---------|----------------------------------------------------------------|
| K011    | Nephrotic syndrome with membranous glomerulonephritis          |
| K012    | Nephrotic syndrome+membranoproliferative glomerulonephritis    |
| K013    | Nephrotic syndrome with minimal change glomerulonephritis      |
| K013-2  | Steroid sensitive nephrotic syndrome                           |
| K014    | Nephrotic syndrome, minor glomerular abnormality               |
| K015    | Nephrotic syndrome, focal and segmental glomerular lesions     |
| K016    | Nephrotic syndrome, diffuse membranous glomerulonephritis      |
| K017    | Nephrotic syn difus mesangial prolifertiv glomerulonephritis   |
| K018    | Nephrotic syn,difus endocapillary prolifitv glomerulonephritis |
| K01A    | Nephrotic syndrome, dense deposit disease                      |
| K01B    | Nephrotic syndrome, diffuse crescentic glomerulonephritis      |
| K01w    | Congenital nephrotic syndrome                                  |
| K01x0   | Nephrotic syndrome in amyloidosis                              |
| K01x1   | Nephrotic syndrome in diabetes mellitus                        |
| K01x2   | Nephrotic syndrome in malaria                                  |
| K01x3   | Nephrotic syndrome in polyarteritis nodosa                     |
| K01x4   | Nephrotic syndrome in systemic lupus erythematosus             |
| K01y    | Nephrotic syndrome with other pathological kidney lesions      |
| K01z    | Nephrotic syndrome NOS                                         |
| K034    | Renal cortical necrosis unspecified                            |
| K035    | Renal medullary necrosis unspecified                           |
| K04     | Acute renal failure                                            |
| K041    | Acute renal cortical necrosis                                  |
| K042    | Acute renal medullary necrosis                                 |
| K043    | Acute drug-induced renal failure                               |
| K044    | Acute renal failure due to urinary obstruction                 |
| K04y    | Other acute renal failure                                      |
| K05     | Chronic renal failure                                          |
| K05-2   | End stage renal failure                                        |
| K050    | End stage renal failure                                        |
| K06     | Renal failure unspecified                                      |
| K060    | Renal impairment                                               |
| K060-1  | Impaired renal function                                        |
| K071    | Renal fibrosis                                                 |
| K07z    | Renal sclerosis NOS                                            |
| K08     | Impaired renal function disorder                               |
| K080    | Renal osteodystrophy                                           |
| K08y    | Other impaired renal function disorder                         |
| K08y4   | Renal tubular acidosis                                         |
| K08yz   | Other impaired renal function disorder NOS                     |
| K08yz-1 | Renal acidaemia                                                |
| K08z    | Impaired renal function disorder NOS                           |
| K0A07   | Acute nephrotic syndrm diffuse crescentic glomerulonephritis   |
| K0B     | Renal tubulo-interstitial disorders in diseases EC             |

|         |                                                              |
|---------|--------------------------------------------------------------|
| K0B40   | Renal tubulo-interstitial disorder in SLE                    |
| K0D     | End-stage renal disease                                      |
| K0E     | Acute-on-chronic renal failure                               |
| K0y     | Other specified nephritis, nephrosis or nephrotic syndrome   |
| K0z     | Nephritis, nephrosis and nephrotic syndrome NOS              |
| K138-1  | Renal vascular disorders                                     |
| K1380   | Renal artery embolism                                        |
| K1381   | Renal artery haemorrhage                                     |
| K1382   | Renal artery thrombosis                                      |
| K138z   | Renal vascular disorders NOS                                 |
| K138z-1 | Renal infarction                                             |
| Kyu1    | [X]Renal tubulo-interstitial diseases                        |
| Kyu2    | [X]Renal failure                                             |
| Kyu20   | [X]Other acute renal failure                                 |
| Kyu21   | [X]Other chronic renal failure                               |
| Kyu40   | [X]Other disorders resulting/impaired renal tubular function |
| L0703   | Unspecified abortion with renal failure                      |
| L093    | Renal failure following abortive pregnancy                   |
| L162    | Unspecified renal disease in pregnancy                       |
| L1620   | Unspecified renal disease in pregnancy unspecified           |
| L1621   | Unspecified renal disease in pregnancy - delivered           |
| L393    | Acute renal failure following labour and delivery            |
| L3930   | Post-delivery acute renal failure unspecified                |
| L3931   | Post-delivery acute renal failure - delivered with p/n prob  |
| L3932   | Post-delivery acute renal failure with postnatal problem     |
| P7690   | Renal artery stenosis                                        |
| PD0     | Renal agenesis and dysgenesis                                |
| PD000   | Bilateral renal agenesis                                     |
| PD030   | Bilateral renal hypoplasia                                   |
| PD1     | Congenital cystic kidney disease                             |
| PD1-1   | Congenital cystic renal disease                              |
| PD11    | Polycystic kidney disease                                    |
| PD11z   | Polycystic kidney disease NOS                                |
| PD11z-1 | Cystic kidney disease NEC                                    |
| PD13    | Multicystic renal dysplasia                                  |
| PD1y    | Other specified congenital cystic kidney disease             |
| PD1y0   | Fibrocystic kidney disease                                   |
| PD1y0-1 | Fibrocystic renal degeneration                               |
| PD1yz   | Other congenital cystic kidney disease NOS                   |
| PD1z    | Congenital cystic kidney disease NOS                         |
| Pyu70   | [X]Other cystic kidney diseases                              |
| Q48y0   | Congenital renal failure                                     |
| SK08    | Acute renal failure due to rhabdomyolysis                    |
| SP154   | Renal failure as a complication of care                      |

|         |                                          |
|---------|------------------------------------------|
| SPI54-1 | Kidney failure as a complication of care |
| SPI54-2 | Post operative renal failure             |

#### 10) Statins

|                 |                                                    |
|-----------------|----------------------------------------------------|
| ATCH52120NEMIS  | Atorvastatin Chewable Tablets Sugar Free 10 mg     |
| ATCH52123NEMIS  | Atorvastatin Chewable Tablets Sugar Free 20 mg     |
| ATOR21782NEMIS  | Atorvastatin Oral suspension 20 mg/5 ml            |
| ATOR45702NEMIS  | Atorvastatin Oral suspension 10 mg/5 ml            |
| ATOR45703NEMIS  | Atorvastatin Oral solution 10 mg/5 ml              |
| ATOR46710NEMIS  | Atorvastatin Oral solution 20 mg/5 ml              |
| ATTA30130EMIS   | Atorvastatin Tablets 10 mg                         |
| ATTA30131EMIS   | Atorvastatin Tablets 20 mg                         |
| ATTA30132EMIS   | Atorvastatin Tablets 40 mg                         |
| ATTA6253NEMIS   | Atorvastatin Tablets 80 mg                         |
| ATTA73968NEMIS  | Atorvastatin Tablets 30 mg                         |
| ATTA73969NEMIS  | Atorvastatin Tablets 60 mg                         |
| CATA41300NEMIS  | Caduet Tablets 5 mg + 10 mg                        |
| CHTA111761NEMIS | Cholib Tablets 145 mg + 20 mg                      |
| CHTA111762NEMIS | Cholib Tablets 145 mg + 40 mg                      |
| CRTA15074NEMIS  | Crestor Tablets 10 mg                              |
| CRTA15075NEMIS  | Crestor Tablets 20 mg                              |
| CRTA15076NEMIS  | Crestor Tablets 40 mg                              |
| CRTA21336NEMIS  | Crestor Tablets 5 mg                               |
| DOM/43668NEMIS  | Dorisin Xl M/R tablets 80 mg                       |
| EZTA20280NEMIS  | Ezetimibe And Simvastatin Tablets 10 mg + 20 mg    |
| EZTA20281NEMIS  | Ezetimibe And Simvastatin Tablets 10 mg + 40 mg    |
| EZTA20282NEMIS  | Ezetimibe And Simvastatin Tablets 10 mg + 80 mg    |
| FETA111758NEMIS | Fenofibrate And Simvastatin Tablets 145 mg + 20 mg |
| FETA111759NEMIS | Fenofibrate And Simvastatin Tablets 145 mg + 40 mg |
| FLCA24125EMIS   | Fluvastatin Capsules 20 mg                         |
| FLCA24126EMIS   | Fluvastatin Capsules 40 mg                         |
| FLTA5289NEMIS   | Fluvastatin M/R tablets 80 mg                      |
| INTA20284NEMIS  | Inegy Tablets 10 mg/20 mg                          |
| INTA20285NEMIS  | Inegy Tablets 10 mg/40 mg                          |
| INTA20286NEMIS  | Inegy Tablets 10 mg/80 mg                          |
| LECA24121EMIS   | Lescol Capsules 20 mg                              |
| LECA24122EMIS   | Lescol Capsules 40 mg                              |
| LETA5290NEMIS   | Lescol Xl M/R tablets 80 mg                        |
| LICH52125NEMIS  | Lipitor Chewable tablets 10 mg                     |
| LICH52126NEMIS  | Lipitor Chewable tablets 20 mg                     |
| LITA10719BRIDL  | Lipostat Tablets 10 mg                             |
| LITA10721BRIDL  | Lipostat Tablets 20 mg                             |
| LITA1910NEMIS   | Lipobay Tablets 400 micrograms                     |
| LITA30124EMIS   | Lipitor Tablets 10 mg                              |

|                 |                                                     |
|-----------------|-----------------------------------------------------|
| LITA30125EMIS   | Lipitor Tablets 20 mg                               |
| LITA30126EMIS   | Lipitor Tablets 40 mg                               |
| LITA30703EMIS   | Lipostat Tablets 40 mg                              |
| LITA30759EMIS   | Lipobay Tablets 100 micrograms                      |
| LITA30760EMIS   | Lipobay Tablets 200 micrograms                      |
| LITA30761EMIS   | Lipobay Tablets 300 micrograms                      |
| LITA6254NEMIS   | Lipitor Tablets 80 mg                               |
| LITA6646NEMIS   | Lipobay Tablets 800 micrograms                      |
| LUM/35734NEMIS  | Luvinsta XI M/R tablets 80 mg                       |
| NAM/86955NEMIS  | Nandovar XI M/R tablets 80 mg                       |
| PIM/42037NEMIS  | Pinmactil M/R tablets 80 mg                         |
| PROR105037NEMIS | Pravastatin Oral suspension 5 mg/5 ml               |
| PROR43659NEMIS  | Pravastatin Oral suspension 40 mg/5 ml              |
| PROR81506NEMIS  | Pravastatin Oral solution 5 mg/5 ml                 |
| PRTA10455HILLI  | Pravastatin Tablets 10 mg                           |
| PRTA10456HILLI  | Pravastatin Tablets 20 mg                           |
| PRTA30705EMIS   | Pravastatin Tablets 40 mg                           |
| RATA18271NEMIS  | Ranzolont Tablets 10 mg                             |
| RATA18272NEMIS  | Ranzolont Tablets 20 mg                             |
| RATA18273NEMIS  | Ranzolont Tablets 40 mg                             |
| ROTA15069NEMIS  | Rosuvastatin Tablets 10 mg                          |
| ROTA15071NEMIS  | Rosuvastatin Tablets 20 mg                          |
| ROTA15072NEMIS  | Rosuvastatin Tablets 40 mg                          |
| ROTA21335NEMIS  | Rosuvastatin Tablets 5 mg                           |
| SIOR20422NEMIS  | Simvastatin Oral suspension 20 mg/5 ml              |
| SIOR25476NEMIS  | Simvastatin Oral suspension 40 mg/5 ml              |
| SIOR44785NEMIS  | Simvastatin Oral Suspension (Sugar-Free) 20 mg/5 ml |
| SIOR44786NEMIS  | Simvastatin Oral Suspension (Sugar-Free) 40 mg/5 ml |
| SIOR45597NEMIS  | Simvastatin Oral solution 20 mg/5 ml                |
| SIOR45598NEMIS  | Simvastatin Oral solution 40 mg/5 ml                |
| SITA10076BRIDL  | Simvastatin Tablets 10 mg                           |
| SITA10078BRIDL  | Simvastatin Tablets 20 mg                           |
| SITA16195NEMIS  | Simvador Tablets 10 mg                              |
| SITA16196NEMIS  | Simvador Tablets 20 mg                              |
| SITA16197NEMIS  | Simvador Tablets 40 mg                              |
| SITA29406EMIS   | Simvastatin Tablets 40 mg                           |
| SITA34996NEMIS  | Simvador Tablets 80 mg                              |
| SITA3663NEMIS   | Simvastatin Tablets 80 mg                           |
| STM/44675NEMIS  | Stefluvin XI M/R tablets 80 mg                      |
| ZOTA29404EMIS   | Zocor Tablets 40 mg                                 |
| ZOTA3664NEMIS   | Zocor Tablets 80 mg                                 |
| ZOTA8622EGTON   | Zocor Tablets 10 mg                                 |
| ZOTA8623EGTON   | Zocor Tablets 20 mg                                 |

**11) Fibrates**

|                |                                          |
|----------------|------------------------------------------|
| ATCA239        | Atromid-S Capsules 500 mg                |
| BEM/34165EMIS  | Bezagen XI M/R tablets 400 mg            |
| BETA362        | Bezalip Tablets 200 mg                   |
| BETA363        | Bezalip-Mono M/R tablets 400 mg          |
| BETA4655       | Bezafibrate Tablets 200 mg               |
| BETA4656       | Bezafibrate M/R tablets 400 mg           |
| CITA21919EMIS  | Ciprofibrate Tablets 100 mg              |
| CLCA647        | Clofibrate Capsules 500 mg               |
| FECA1203NEMIS  | Fenofibrate Capsules (Micronised) 267 mg |
| FECA13841NEMIS | Fenogal Capsules 200 mg                  |
| FECA18893NEMIS | Fenofibrate Capsules (Micronised) 200 mg |
| FECA24144EMIS  | Fenofibrate Capsules 200 mg              |
| FECA31990EMIS  | Fenofibrate Capsules (Micronised) 67 mg  |
| FECA9492HILLI  | Fenofibrate Capsules 100 mg              |
| FETA5643NEMIS  | Fenofibrate Tablets (Micronised) 160 mg  |
| FIM/51928NEMIS | Fibrzate XI M/R tablets 400 mg           |
| LICA1205NEMIS  | Lipantil Micro 267 Capsules 267 mg       |
| LICA1207NEMIS  | Lipantil Micro 200 Capsules 200 mg       |
| LICA22524NEMIS | Lipanthyl 300 Capsules                   |
| LICA24142EMIS  | Lipantil Micro Capsules 200 mg           |
| LICA9431BRIDL  | Lipantil Capsules 100 mg                 |
| LIM/3539NEMIS  | Liparol XI M/R tablets 400 mg            |
| LITA31988EMIS  | Lipantil Micro 67 Capsules 67 mg         |
| MOTA21917EMIS  | Modalim Tablets 100 mg                   |
| SUTA5645NEMIS  | Supralip Tablets 160 mg                  |
| ZIM/5338NEMIS  | Zimbacol XI M/R tablets 400 mg           |

**12) Bile Acid Sequestrants**

|                |                                                             |
|----------------|-------------------------------------------------------------|
| CHPO612        | Cholestyramine Powder 4g                                    |
| CHSU15277NEMIS | Cholestyramine Sugar Free Powder 4 grams/sachet             |
| CHTA27652NEMIS | Cholestagel Tablets 625 mg                                  |
| COGR4776       | Colestipol Hydrochloride Sugar free granules 5 grams/sachet |
| COGR713        | Colestid Granules Plain, 5 grams/sachet                     |
| COOR17597NEMIS | Colestyramine Oral Powder (sachets) 4 grams/sachet          |
| COOR17598NEMIS | Colestyramine Oral Powder Sachets Sugar Free 4 grams/sachet |
| COSA21955EMIS  | Colestid Orange Sachets 5 grams/sachet                      |
| COSA21957EMIS  | Colestipol Hydrochloride Sachets (orange) 5 grams/sachet    |
| MUTA3984       | Muripisin Tablets                                           |
| QUPO2421       | Questran Powder 4g                                          |
| QUPO9528BRIDL  | Questran Light Powder 4 grams/sachet                        |

**13) Nicotinic Acid**

|         |                         |
|---------|-------------------------|
| BRTA395 | Bradilan Tablets 250 mg |
|---------|-------------------------|

|                |                                                                                      |
|----------------|--------------------------------------------------------------------------------------|
| BRTA396        | Bradilan Tablets 500 mg                                                              |
| NACA48437NEMIS | Nature's Bounty Time Released Niacin Capsules 250 mg                                 |
| NIM/14469NEMIS | Nicotinic Acid M/R tablets 500 mg                                                    |
| NIM/16456NEMIS | Nicotinic Acid M/R tablets 750 mg                                                    |
| NIM/16457NEMIS | Nicotinic Acid M/R tablets 1 gram                                                    |
| NIM/16459NEMIS | Niaspan M/R tablets 500 mg                                                           |
| NIM/16460NEMIS | Niaspan M/R tablets 750 mg                                                           |
| NIM/16461NEMIS | Niaspan M/R tablets 1 gram                                                           |
| NIM/16463NEMIS | Nicotinic Acid Titration Starter Pack M/R tablets 7 x 375 mg, 7 x 500 mg, 7 x 750 mg |
| NIM/16465NEMIS | Niaspan Titration Starter Pack M/R tablets 7 x 375 mg, 7 x 500 mg, 7 x 750 mg        |
| NIM/33335NEMIS | Nicotinic Acid And Laropiprant M/R tablets 1 gram + 20 mg                            |
| NITA1983       | Nicotinic Acid Tablets 100 mg                                                        |
| NITA1984       | Nicotinic Acid Tablets 25 mg                                                         |
| NITA1985       | Nicotinic Acid Tablets 50 mg                                                         |
| NITA5202       | Nicofuranose Tablets 250 mg                                                          |
| TRM/38503NEMIS | Tredaptive M/R tablets 1 gram + 20 mg                                                |

#### 14) PCSK9 Inhibitors

|                 |                                                                        |
|-----------------|------------------------------------------------------------------------|
| EVSO105025NEMIS | Evolocumab Solution for injection 140 mg/1 ml pre-filled syringe       |
| EVSO105029NEMIS | Evolocumab Solution for injection 140 mg/1 ml pre-filled device        |
| RESO105028NEMIS | Repatha Solution for injection 140 mg/1 ml pre-filled syringe          |
| RESO105031NEMIS | Repatha Sureclick Solution for injection 140 mg/1 ml pre-filled device |
